# Supplementary material for: Identifying prostate cancer and its clinical risk in asymptomatic men using machine learning of high dimensional peripheral blood flow cytometric natural killer cell subset phenotyping data
Source: eLife. 2020 Jul 28;9:e50936. doi: 10.7554/eLife.50936 (PMC7386909; doi:10.7554/eLife.50936)
Supplement: Source data 1. [file elife-50936-data1.xlsx]

## Sheet: Pockleyetal.
							CD56dim %	CD56+CD8 %	NKp30 receptor %		NKp46 receptor %	DNAM-1 receptor %	LAIR-1 receptor %
							CD16high	CD56brightCD8+	CD56+NKp30+	CD56+NKp30-	CD56+NKp46+	CD56+DNAM-1-	CD56+LAIR-1+	CD56+LAIR-1-
							2	14	15	16	17	20	27	28
P1	73	9.4	-	Benign	Atypia	-	65.7533	0.926667	93.8	6.19	86.29	1.53	99.77	0.21
P2	66	6.2	-	Benign	High PIN	-	66.1667	1.23333	51.75	48.25	53.02	1.23	99.9	0.1
P3	63	7.8	-	Benign	Atypia	-	77.6167	0.366667	82.08	16.68	50.99	1.87	99.57	0.41
P4	66	6.5	-	Benign	Atypia	-	81.7967	0.676667	90.95	9.05	71.36	6.99	99.37	0.58
P5	58	6.1	-	Benign	High PIN	-	76.4567	1.39667	96.74	3.26	75.96	1.63	99.88	0.02
P6	62	7.7	-	Benign	Atypia	-	62.2433	3.40333	91.33	8.35	86.52	3.75	99.53	0.09
P7	66	15	-	Benign	Benign	-	84.86	0.753333	77.78	23.48	51.01	1.99	99.63	0.3
P8	68	5.8	-	Benign	Benign	-	79.6733	1.27333	94.09	5.46	63.17	2.54	99.57	0.38
P9	66	10	-	Benign	Benign	-	72.9367	1.09333	62.88	37.12	49.51	2.03	99.36	0.59
P10	64	5.1	-	Benign	High PIN	-	75.36	2.53333	40.69	58.34	45.28	5.77	97.16	2.79
P11	61	10	-	Benign	High PIN	-	82.9067	0.86	92.03	7.39	81.15	3.9	99.3	0.68
P12	66	7.2	-	Benign	High PIN	-	76.4867	1.91333	79.59	20.41	47.13	1.81	98.28	1.61
P13	66	14.4	-	Benign	Benign	-	81.1733	1.93667	72	26.73	44.7	10.45	99.01	0.9
P14	66	5.3	-	Benign	Benign	-	72.8967	1.03333	84.05	17.02	52.83	16.24	94.97	5.24
P15	69	5.3	-	Benign	Benign	-	64.12	0.996667	77.11	22.89	70.59	6.44	98.66	1.28
P16	67	12		Benign	High PIN	-	67.6267	4.75	95.79	3.95	80.74	2.26	99.66	0.28
P17	60	10.1		Benign	High PIN		All dead
P18	58	19	-	Benign	Atypia	-	76.5433	1.45333	90.15	9.85	63.31	2.73	99.53	0.44
P19	68	8.8	-	Benign	Atypia	-	87.46	4.27333	54.63	43.2	59.7	37.29	99.29	0.7
P20	59	7.8	-	Benign	ASAP	-	84	0.4	94.12	5.88	56.67	1.21	99.58	0.39
P21	50	4.7	-	Benign	Atypia	-	81.62	1.27	80.94	19.06	50.87	0.87	99.81	0.15
P22	57	5.9	-	Benign	High PIN	-	79.2933	1.36333	85.37	15.93	61.49	1.88	99.11	0.54
P23	70	6.5	-	Benign	High PIN	-	72	0.913333	69.89	30.1	38.11	1.65	99.57	0.36
P24	76	7.8	-	Benign	Atypia	-	63.4933	1.9	82.89	17.11	61.56	6.85	99.09	0.7
P25	70	8.2	-	Benign	Atypia	-	67.5833	1.32	94.47	5.92	70.57	3.6	98.41	1.07
P26	64	11.7	-	Benign	Benign	-	79.4367	0.633333	48.94	51.06	48.36	5.1	99.44	0.34
P27	66	8.3	-	Benign	Atypia	-	63.79	0.53	96	4	74.89	0.86	99.49	0.24
P28	54	6.5	-	Benign	High PIN	-	24.3833	0.766667	75.94	22.12	69.15	1.86	99.45	0.34
P29	60	5.3	-	Benign	ASAP	-	81.2233	0.39	50.44	49.54	60.67	3.03	99.65	0.13
P30	67	6.4	-	Benign	Benign	-	65.4233	1.35	94.02	5.96	78.66	3.65	96.71	1.44
P31	71	7	-	Benign	Benign	-	72.16	0.696667	92.93	7.07	75.09	1.12	99.38	0.43
P32	61	4.7	T1	Cancer	3+3	LOW	75.2767	2.62	94.9	5.1	76.61	11.66	99.29	0.7
P33	59	9.8	T2a	Cancer	3+3	LOW	73.4567	2.80667	95.17	4.42	67.86	4.76	99.01	0.94
P34	65	7.3	T2a	Cancer	3+3	LOW	83.7933	1.44667	71.39	28.61	45.68	1.67	99.62	0.38
P35	67	7.1	T2a	Cancer	3+4	Intermediate	86.49	1.22	91.83	8.15	68.32	1.72	99.8	0.15
P36	77	9.1	T2c	Cancer	4+3	Intermediate	69.2967	3.68333	91.53	8.78	76.74	6.22	99.7	0.26
P37	75	11	T2c	Cancer	3+4	Intermediate	70.9333	2.19333	94.34	5.66	72.81	5.99	99.89	0.05
P38	65	6.3	T2c	Cancer	4+5	High	71.4567	0.603333	93.35	6.65	64.46	1.02	99.88	0.11
P39	66	10.4		Cancer	3+4	Intermediate	71.1433	1.4	88.11	11.09	66.1	0.62	99.63	0.36
P40	80	11	T2b	Cancer	3+3	Intermediate	56.4267	5.91	85.01	14.99	72.42	4.24	99.15	0.83
P41	63	8.5	T1	Cancer	3+3	LOW	77.2067	2.04	96.18	4.15	82.57	6.53	99.36	0.65
P42	59	11	T2b	Cancer	3+3	Intermediate	89.3267	0.423333	93.4	6.6	72.42	1.65	99.68	0.3
P43	65	5.1	T2a	Cancer	4+3	Intermediate	84.02	0.423333	94.99	4.61	69.46	1.07	98.94	1.03
P44	72	5.8	T2a	Cancer	3+4	Intermediate	77.4033	0.72	93.83	5.8	55.6	3.61	99.68	0.28
P45	71	6.1	T2a	Cancer	3+3	LOW	53.4567	6.64	86.58	13.42	67.24	1.79	99.84	0.15
P46	69	5.1	T2a	Cancer	3+3	LOW	69.59	0.903333	75.11	24.89	55.61	4.85	99.65	0.3
P47	66	8.8	T2a	Cancer	3+3	LOW	74.4767	0.253333	91.39	7.99	57.9	0.42	99.87	0.1
P48	75	18	T2b	Cancer	4+5	High	78.81	1.59	94.3	5.38	74.72	3	98.96	0.93
P49	64	13	T2c	Cancer	3+4	Intermediate	79.1433	2.00667	97.31	2.69	90.4	6.42	99.24	0.59
P50	63	5.8	T2b	Cancer	3+3	Intermediate	78.61	1.08	98.43	1.57	78.81	1.66	99.58	0.23
P51	68	11	T1	Cancer	3+3	Intermediate	74.8733	3.15333	88.24	11.76	67.71	7.67	96.9	2.78
P52	54	10		Cancer	4+3	Intermediate	79.7	0.97	95.28	5.1	68.91	1.18	99.55	0.38
P53	64	5.7		Cancer	3+4	Intermediate	73.1033	1.16667	96.5	3.5	85.08	2.32	99.68	0.29
P54	57	6.1	T1	Cancer	3+3	LOW	51.7933	3.29667	96.4	3.6	88.74	5.14	98.41	1.48
P55	55	8.4		Cancer	3+4	Intermediate	70.33	2.06667	96.72	3.53	67.46	1.4	99.42	0.5
P56	55	6.4	T2a	Cancer	3+3	Low	82.56	2.13333	91.22	8.78	82.63	3.19	99.74	0.22
P57	58	4.7	T2a	Cancer	3+4	Intermediate	78.93	0.566667	79.2	22.25	45.37	3.19	99.66	0.26
P58	63	7.3	T2a	Cancer	3+4	Intermediate	79.9433	0.94	90.57	9.43	67.21	2.7	99.73	0.23
P59	61	7.2	T2b	Cancer	3+4	Intermediate	63.1333	0.31	75.08	24.92	52.92	2.13	99.62	0.28
P60	66	5.5	T2b	Cancer	3+3	Low	82.7867	0.973333	97.74	2.21	95.82	5.25	99.71	0.23
P61	66	8.1	T2b	Cancer	3+4	Intermediate	59.5767	2.58	92.64	6.99	62.35	6.9	21.43	78.2
P62	74	11	T2c	Cancer	4+3	Intermediate	74.66	0.326667	94.46	5.97	52.79	4.01	99.8	0.19
P63	68	5.8	T2c	Cancer	3+4	Intermediate	56.2167	2.85333	56.8	44.59	68.89	10.04	99.59	0.23
P64	67	7.5	T2c	Cancer	3+4	Intermediate	67.4567	3.00333	62.47	35.65	80.75	6.24	99.2	0.39
P65	61	13	T2c	Cancer	3+4	Intermediate	49.66	0.893333	62.08	37.9	59.47	1.16	99.38	0.4
P66	64	6.3	T2c	Cancer	3+3	Low	80.4133	0.456667	94.83	5.57	75.48	1.11	99.78	0.13
P67	58	4.7		Cancer	3+3	Low	78.75	1.13333	96.02	3.98	76.56	0.86	99.38	0.35
P68	65	6.1	T2c	Cancer	3+4	Intermediate	56.19	1.66	82.35	16.99	74.69	1.56	98.93	0.72
P69	72	10	T1	Cancer	3+4	Intermediate	83.02	0.593333	94.48	5.08	78.41	2.37	99.6	0.3
P70	69	8	T2c	Cancer	3+4	Intermediate	87.65	0.753333	94.96	5.02	66.85	2.6	99.62	0.1
P71	53	6.3	T1	Cancer	3+4	Intermediate	80.0433	1.73667	82.4	18.69	75.12	2.72	99.32	0.37
P72	70	19	T1	Cancer	4+3	High	75.02	0.36	83.36	16.64	53.81	4.73	97.22	2.2
